# Supplementary material for: Massively parallel unsupervised single-particle cryo-EM data clustering via statistical manifold learning
Source: PubMed Central journal article supplement (PMC5546606; doi:10.1371/journal.pone.0182130), 2017-08-07

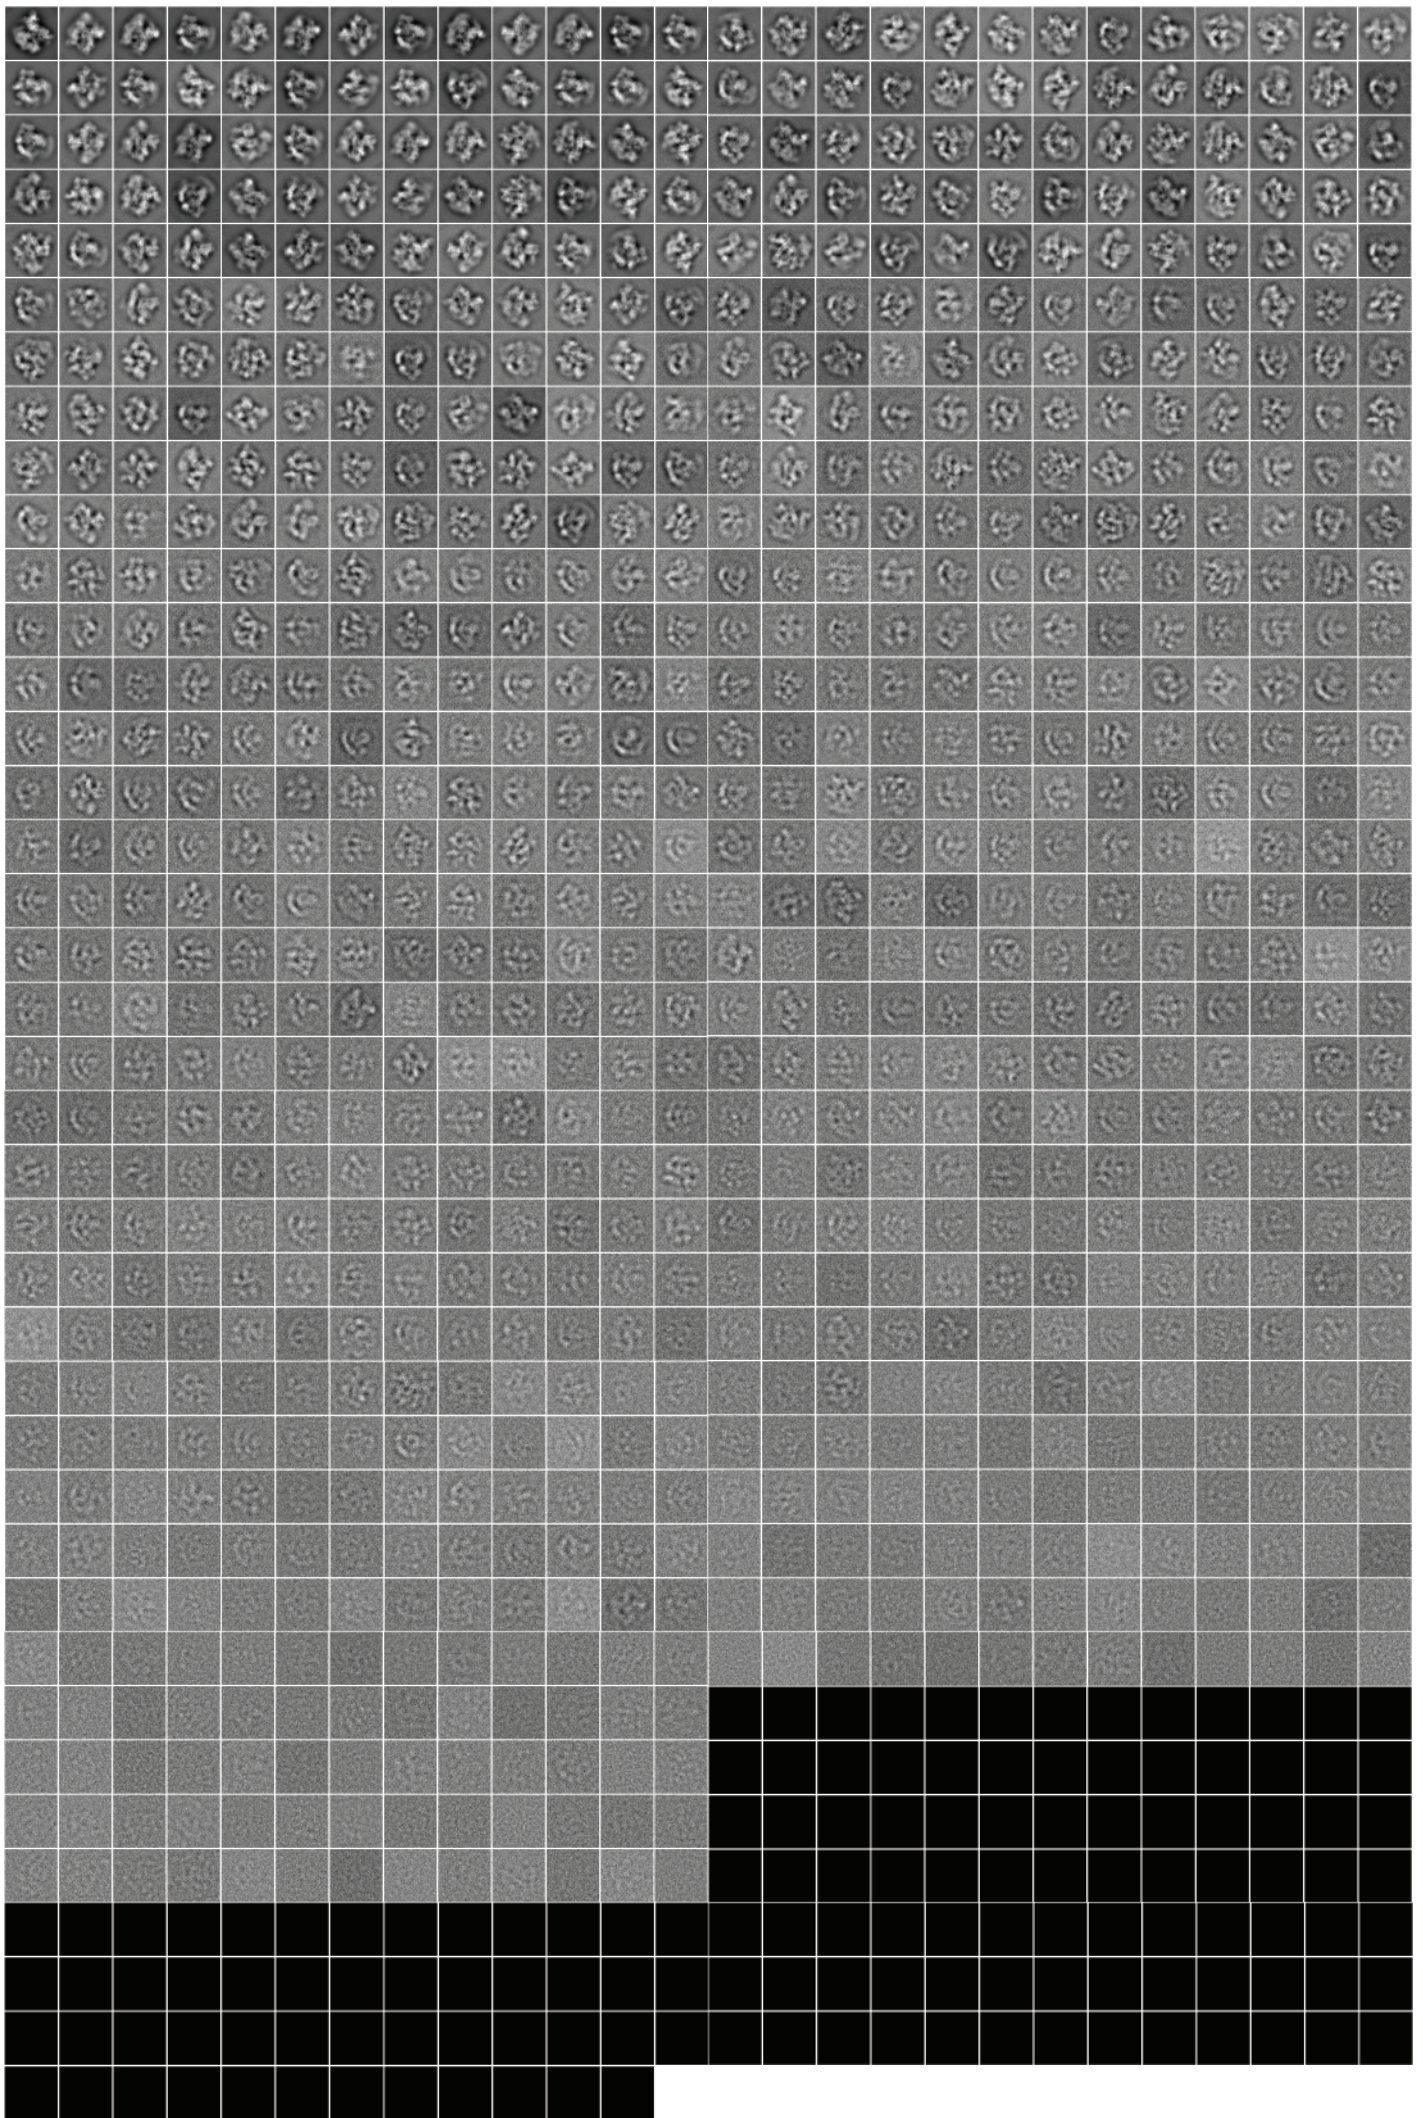

Supplement: pone.0182130.s002.pdf [file pone.0182130.s002.pdf]
