# Supplementary material for: Massively parallel unsupervised single-particle cryo-EM data clustering via statistical manifold learning
Source: PubMed Central journal article supplement (PMC5546606; doi:10.1371/journal.pone.0182130), 2017-08-07

**A**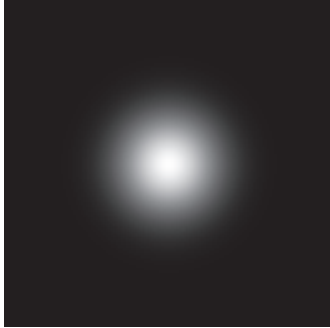

Radius=0.1xwidth

**B**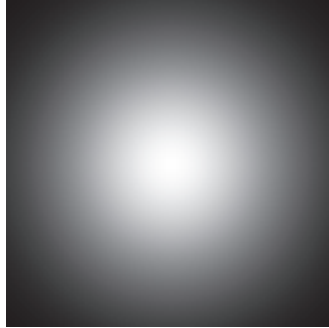

Radius=0.25xwidth

**C**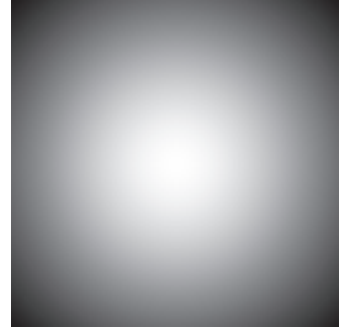

Radius=0.4xwidth

**D**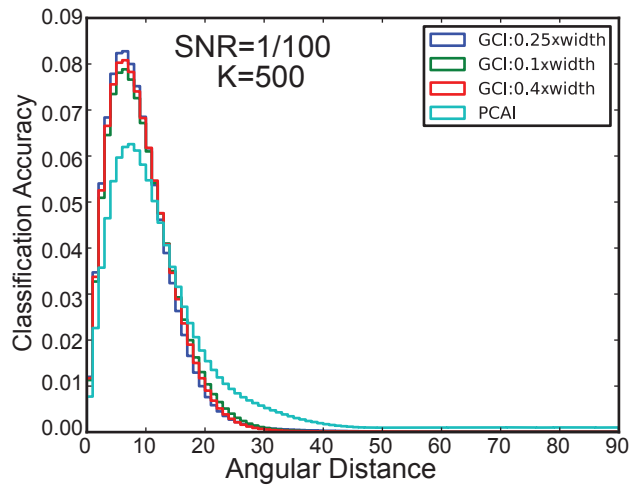**E**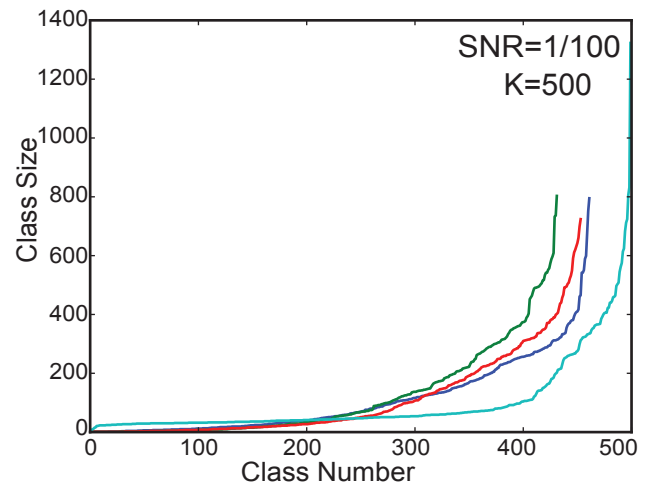**F**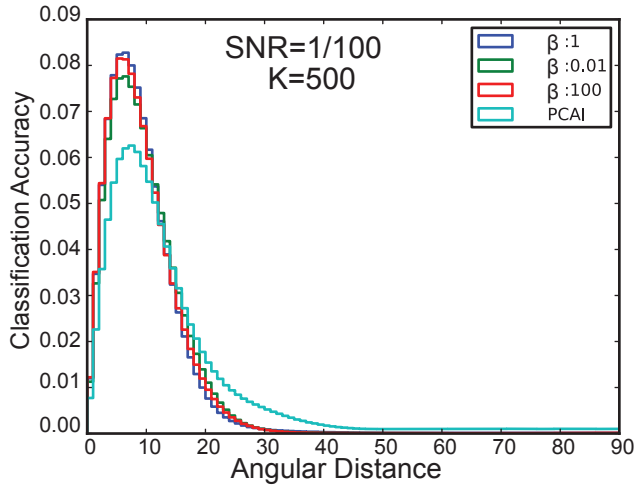**G**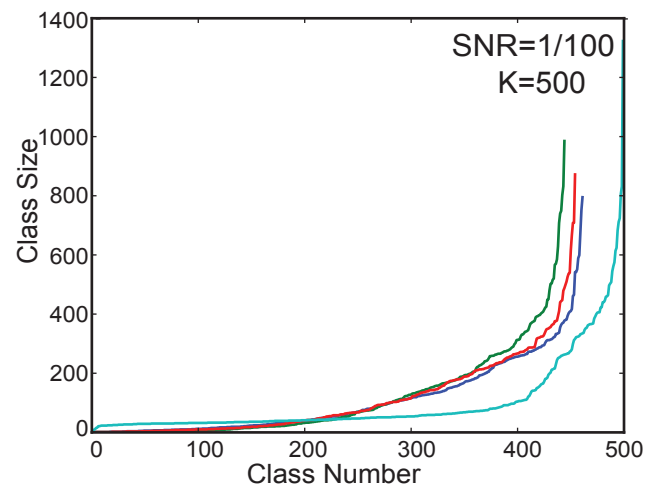

Supplement: pone.0182130.s007.pdf [file pone.0182130.s007.pdf]
