# Supplementary material for: Massively parallel unsupervised single-particle cryo-EM data clustering via statistical manifold learning
Source: PubMed Central journal article supplement (PMC5546606; doi:10.1371/journal.pone.0182130), 2017-08-07

**A**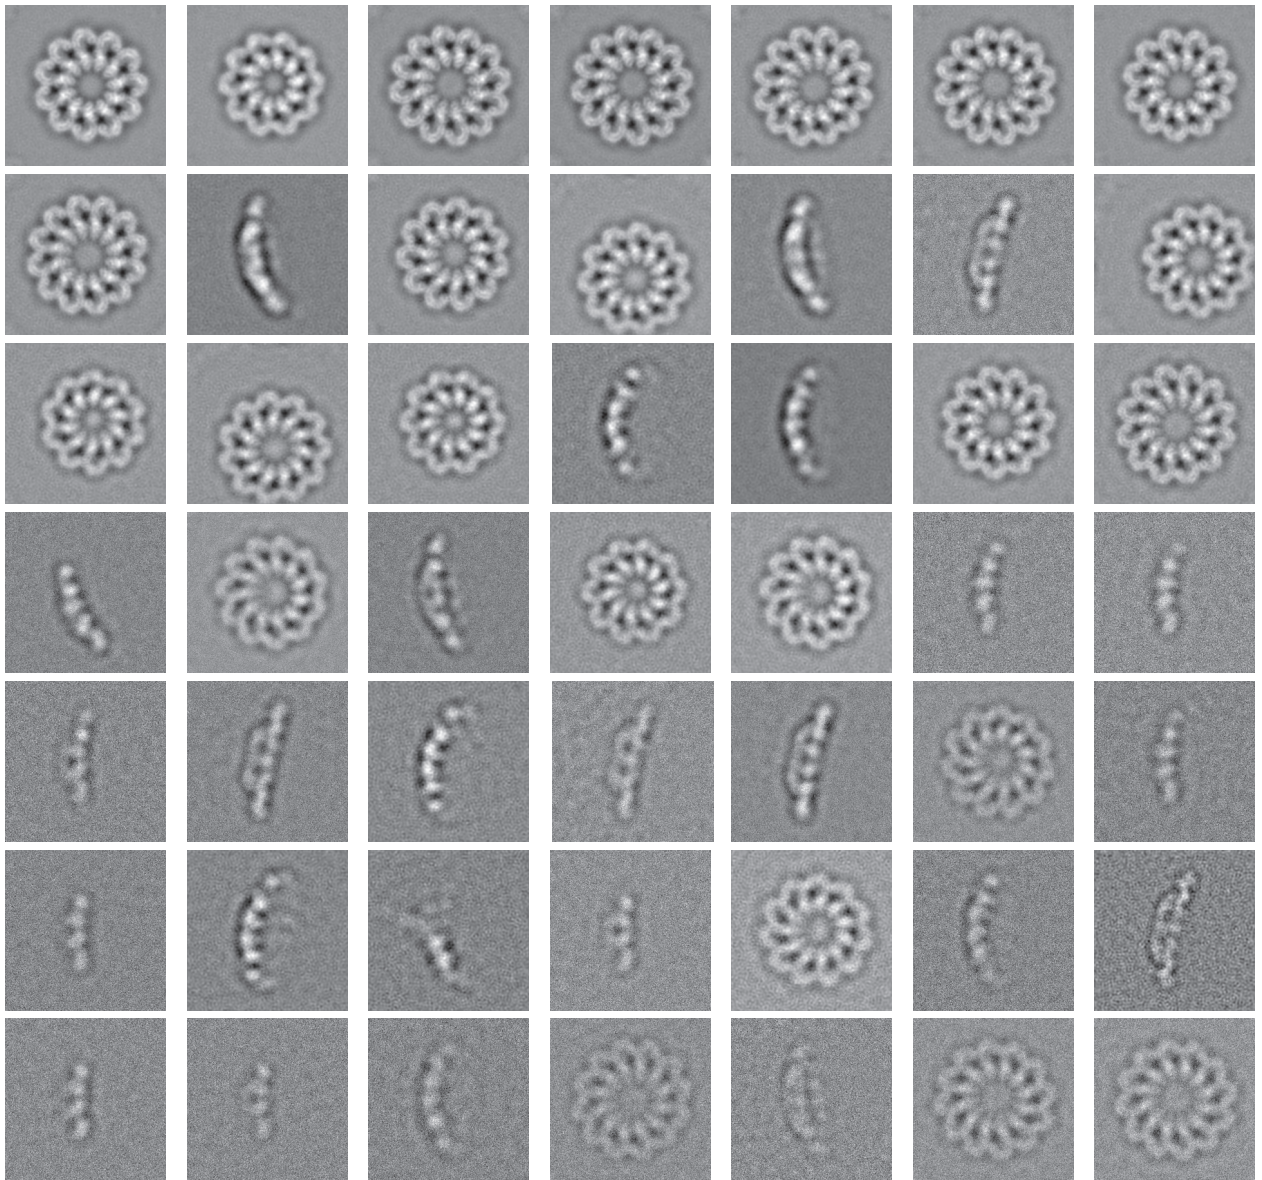**B**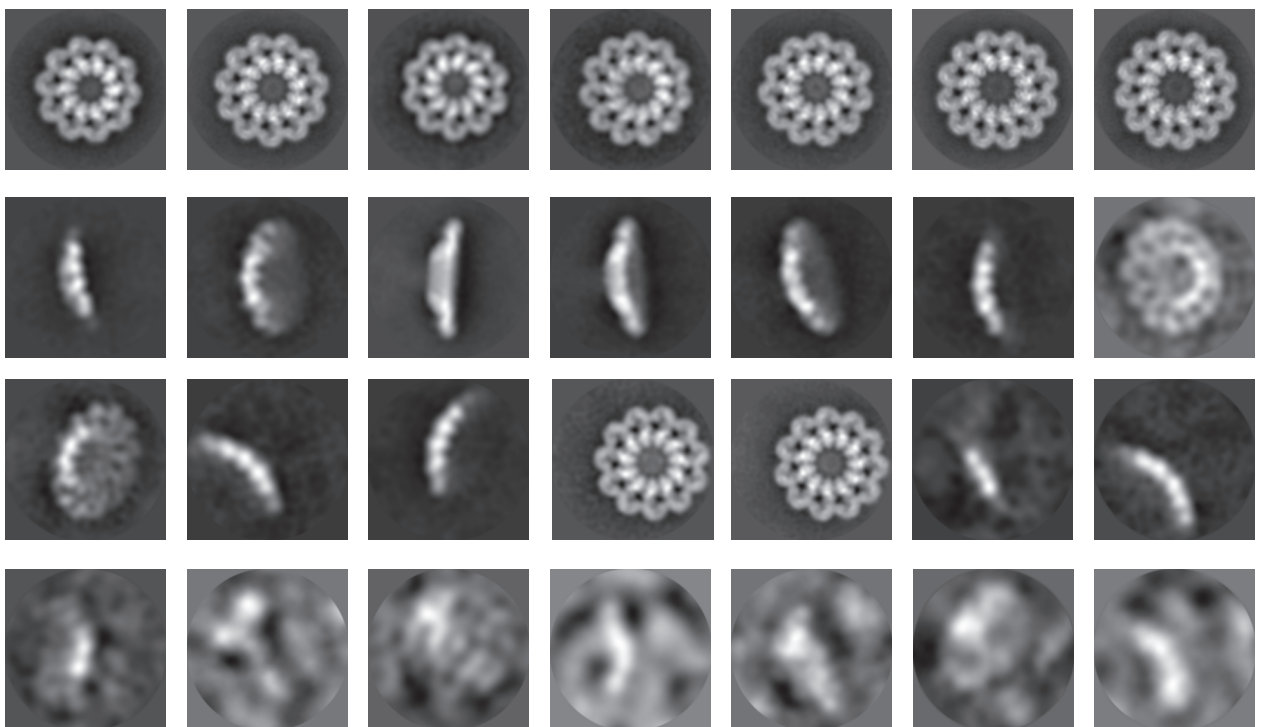

Supplement: pone.0182130.s008.pdf [file pone.0182130.s008.pdf]
