# Supplementary material for: Massively parallel unsupervised single-particle cryo-EM data clustering via statistical manifold learning
Source: PubMed Central journal article supplement (PMC5546606; doi:10.1371/journal.pone.0182130), 2017-08-07
Supplement: pone.0182130.s011.pdf [file pone.0182130.s011.pdf]

**S1 Table**

| Software            | class number | time(minutes) | data      | images number | pixels  |
|---------------------|--------------|---------------|-----------|---------------|---------|
| RELION              | 300          | 307           | Dataset 1 | 16306         | 250*250 |
| ROME_MAP            | 30           | 12            | Dataset 1 | 16306         | 250*250 |
| ROME_MAP(K=30)+gtm  | 300          | 20            | Dataset 1 | 16306         | 250*250 |
| RELION              | 300          | 880           | Dataset 2 | 35407         | 160*160 |
| ROME_MAP            | 30           | 56            | Dataset 2 | 35407         | 160*160 |
| ROME_MAP(K=30)+gtm  | 300          | 63            | Dataset 2 | 35407         | 160*160 |
| RELION              | 30           | 372           | Dataset 3 | 96488         | 180*180 |
| RELION              | 50           | 421           | Dataset 3 | 96488         | 180*180 |
| RELION              | 100          | 555           | Dataset 3 | 96488         | 180*180 |
| RELION              | 200          | 859           | Dataset 3 | 96488         | 180*180 |
| RELION              | 300          | 1132          | Dataset 3 | 96488         | 180*180 |
| ROME_MAP            | 30           | 92            | Dataset 3 | 96488         | 180*180 |
| ROME_MAP            | 50           | 130           | Dataset 3 | 96488         | 180*180 |
| ROME_MAP            | 100          | 216           | Dataset 3 | 96488         | 180*180 |
| ROME_MAP            | 200          | 340           | Dataset 3 | 96488         | 180*180 |
| ROME_MAP            | 300          | 537           | Dataset 3 | 96488         | 180*180 |
| ROME_SML (MAP_K=30) | 100          | 14            | Dataset 3 | 96488         | 180*180 |
| ROME_SML (MAP_K=30) | 300          | 20            | Dataset 3 | 96488         | 180*180 |
| ROME_SML (MAP_K=30) | 500          | 28            | Dataset 3 | 96488         | 180*180 |
| ROME_SML (MAP_K=30) | 700          | 75            | Dataset 3 | 96488         | 180*180 |
| ROME_SML (MAP_K=30) | 800          | 94            | Dataset 3 | 96488         | 180*180 |
| ROME_SML (MAP_K=30) | 900          | 167           | Dataset 3 | 96488         | 180*180 |
| ROME_SML (MAP_K=30) | 1000         | 214           | Dataset 3 | 96488         | 180*180 |
| RELION              | 300          | 2379          | Dataset 4 | 57001         | 160*160 |
| ROME_MAP            | 30           | 134           | Dataset 4 | 57001         | 160*160 |
| ROME_MAP(K=30)+SML  | 300          | 143           | Dataset 4 | 57001         | 160*160 |
| ROME_MAP(K=100)+SML | 1000         | 228           | Dataset 5 | 117471        | 128*128 |
